# Supplementary material for: Apple Fibers as Carriers of Blackberry Juice Polyphenols: Development of Natural Functional Food Additives
Source: MDPI journal article supplement (doi:10.3390/molecules27093029), 2022-05-08
Supplement: s1 [file s1]

Table S1. Volatile compounds identified in blackberry juice (BJ), apple fibers (AF) and apple fiber/blackberry juice complexes (AF/BJ) with their odor descriptor

| Volatiles               | BJ | AF | AF/BJ | Odor descriptor |
|-------------------------|----|----|-------|-----------------|
| Alcohols                |    |    |       |                 |
| 1-butanol               | +  | -  | +     | fruity          |
| 2-ethylhexanol          | +  | +  | +     | fruity          |
| Benzyl alcohol          | -  | -  | +     | fruity          |
| 1-octanol               | +  | +  | +     | green           |
| Phenethyl alcohol       | +  | -  | +     | floral          |
| Perillyl alcohol        | +  | +  | +     | green           |
| Aldehydes and ketones   |    |    |       |                 |
| Hexanal                 | -  | +  | +     | green           |
| Heptanal                | +  | +  | +     | green           |
| 2-heptenal              | -  | +  | +     | green           |
| 1-octen-3-one           | -  | +  | +     | earthy          |
| 6-methyl-5-hepten-2-on  | -  | -  | +     | green           |
| 2,4-heptadienal         | -  | -  | +     | citrus          |
| Octanal                 | -  | -  | +     | green           |
| 2-octenal               | +  | +  | +     | green           |
| 2,6-nonadienal          | -  | -  | +     | floral          |
| Nonanal                 | +  | +  | +     | floral          |
| 2-nonenal               | -  | +  | +     | green           |
| Decanal                 | -  | +  | +     | floral          |
| 2,4-nonadienal          | +  | +  | +     | green           |
| 2-decenal               | +  | +  | +     | citrus          |
| 4-propylbenzaldehyde    | +  | -  | +     | -               |
| 2,4-decadienal          | +  | +  | +     | citrus          |
| Geranylacetone          | +  | +  | +     | floral          |
| Lily aldehyde           | +  | -  | -     | floral          |
| $\alpha$ -hexylcinnamal | +  | -  | -     | floral          |
| Terpenes                |    |    |       |                 |
| D-limonene              | +  | +  | +     | citrus          |
| Citronellal             | +  | +  | +     | floral          |
| Guaiacol                | +  | -  | -     | floral          |
| Linalool                | +  | -  | +     | green           |
| Trans-verbenol          | +  | +  | +     | floral          |
| Menthol                 | +  | -  | +     | -               |
| Nerol                   | +  | -  | +     | minty           |
| Citral                  | +  | -  | +     | citrus          |
| D-limonene              | +  | -  | -     | herbal          |
| Citronellal             | +  | +  | +     | citrus          |
| Vitispirane             | +  | -  | -     | floral          |
| Eugenol                 | +  | -  | +     | spicy           |
| $\beta$ -damascenon     | +  | +  | +     | fruity          |
| $\alpha$ -ionon         | +  | +  | +     | fruity          |
| $\gamma$ -ionone        | +  | +  | +     | fruity          |
| $\beta$ -ionone         | +  | +  | +     | fruity          |

Table S2. Amount of volatile compounds on apple fiber/blackberry juice complexes

| Volatiles              | Complexes                 |                           |                           |                            |                            |                           |
|------------------------|---------------------------|---------------------------|---------------------------|----------------------------|----------------------------|---------------------------|
|                        | AF_1%/BJ                  | AF_2%/BJ                  | AF_4%/BJ                  | AF_6%/BJ                   | AF_8%/BJ                   | AF_10%/BJ                 |
| Alcohols               |                           |                           |                           |                            |                            |                           |
| 2-ethylhexanol         | 6.71±0.38 <sup>c</sup>    | 8.34±0.12 <sup>a</sup>    | 8.63±0.14 <sup>a</sup>    | 6.74±0.09 <sup>c</sup>     | 6.00±0.15 <sup>d</sup>     | 7.23±0.31 <sup>b</sup>    |
| Benzyl alcohol         | 26.26±1.02 <sup>a</sup>   | 24.59±0.15 <sup>a</sup>   | 18.54±0.12 <sup>b</sup>   | 16.57±0.57 <sup>c</sup>    | 15.35±0.11 <sup>d</sup>    | 15.98±0.18 <sup>c,d</sup> |
| 1-octanol              | 44.42±0.56 <sup>e</sup>   | 52.41±1.90 <sup>d</sup>   | 93.35±2.18 <sup>a</sup>   | 94.08±1.27 <sup>a</sup>    | 74.09±0.23 <sup>c</sup>    | 86.56±0.45 <sup>b</sup>   |
| Phenethyl alcohol      | 17.35±0.19 <sup>e</sup>   | 22.45±0.33 <sup>d</sup>   | 23.67±0.35 <sup>c</sup>   | 26.92±0.19 <sup>a</sup>    | 26.06±0.08 <sup>b</sup>    | 27.55±0.19 <sup>a</sup>   |
| Perillyl alcohol       | 6.55±0.25 <sup>e</sup>    | 8.24±0.34 <sup>d</sup>    | 11.31±0.42 <sup>c</sup>   | 13.39±0.17 <sup>b</sup>    | 13.20±0.24 <sup>b</sup>    | 14.91±0.24 <sup>a</sup>   |
| Aldehydes and ketones  |                           |                           |                           |                            |                            |                           |
| Hexanal                | 108.66±4.10 <sup>e</sup>  | 104.42±0.48 <sup>e</sup>  | 139.25±2.35 <sup>d</sup>  | 150.07±1.26 <sup>c</sup>   | 158.90±2.33 <sup>b</sup>   | 297.81±4.57 <sup>a</sup>  |
| Heptanal               | 1.24±0.07 <sup>e</sup>    | 5.50±0.05 <sup>c</sup>    | 11.50±0.28 <sup>a</sup>   | 9.45±0.43 <sup>b</sup>     | 4.96±0.16 <sup>d</sup>     | 4.74±0.28 <sup>d</sup>    |
| 2-heptenal             | 791.25±13.38 <sup>c</sup> | 734.65±8.01 <sup>d</sup>  | 1252.53±7.37 <sup>b</sup> | 1412.70±46.47 <sup>a</sup> | 1452.75±1.99 <sup>a</sup>  | 1456.35±3.01 <sup>a</sup> |
| 1-octen-3-one          | 210.66±1.53 <sup>e</sup>  | 237.30±1.83 <sup>d</sup>  | 366.10±29.68 <sup>c</sup> | 366.49±7.93 <sup>c</sup>   | 373.98±3.26 <sup>b</sup>   | 470.55±7.00 <sup>a</sup>  |
| 6-methyl-5-hepten-2-on | 71.29±2.77 <sup>c</sup>   | 88.86±1.17 <sup>a</sup>   | 89.00±0.41 <sup>a</sup>   | 80.33±0.82 <sup>b</sup>    | 81.63±4.28 <sup>b</sup>    | 82.01±0.93 <sup>b</sup>   |
| 2,4-heptadienal        | 38.00±1.15 <sup>c</sup>   | 39.11±0.22 <sup>c</sup>   | 56.26±2.12 <sup>a</sup>   | 49.03±0.54 <sup>b</sup>    | 47.40±0.83 <sup>b</sup>    | 47.79±3.17 <sup>b</sup>   |
| Octanal                | 79.67±2.37 <sup>e</sup>   | 126.32±2.85 <sup>d</sup>  | 135.92±2.58 <sup>c</sup>  | 141.44±0.74 <sup>b</sup>   | 142.31±1.23 <sup>a,b</sup> | 145.75±2.73 <sup>a</sup>  |
| 2-octenal              | 301.62±11.37 <sup>d</sup> | 391.79±21.97 <sup>c</sup> | 634.65±46.57 <sup>b</sup> | 748.43±3.67 <sup>a</sup>   | 725.79±16.84 <sup>a</sup>  | 732.36±8.80 <sup>a</sup>  |
| 2,6-nonadienal         | 5.79±0.14 <sup>d</sup>    | 7.26±0.14 <sup>c</sup>    | 7.29±0.06 <sup>c</sup>    | 8.42±0.18 <sup>b</sup>     | 8.47±0.11 <sup>b</sup>     | 9.05±0.16 <sup>a</sup>    |
| Nonanal                | 92.35±0.51 <sup>e</sup>   | 113.00±1.07 <sup>d</sup>  | 167.88±1.45 <sup>c</sup>  | 199.50±3.14 <sup>a</sup>   | 171.56±0.28 <sup>b</sup>   | 174.04±1.60 <sup>b</sup>  |
| 2-nonenal              | 46.60±0.87 <sup>f</sup>   | 55.20±3.58 <sup>e</sup>   | 86.46±1.90 <sup>d</sup>   | 105.60±0.19 <sup>b</sup>   | 101.10±0.12 <sup>c</sup>   | 110.32±0.62 <sup>a</sup>  |
| Decanal                | 35.79±0.13 <sup>d</sup>   | 44.15±1.02 <sup>c</sup>   | 50.53±1.67 <sup>b</sup>   | 55.79±1.02 <sup>a</sup>    | 56.44±0.55 <sup>a</sup>    | 56.24±1.35 <sup>a</sup>   |
| 2,4-nonadienal         | 25.29±0.50 <sup>d</sup>   | 28.65±1.39 <sup>c</sup>   | 79.11±2.06 <sup>b</sup>   | 79.78±0.70 <sup>b</sup>    | 80.48±0.91 <sup>b</sup>    | 86.35±0.19 <sup>a</sup>   |
| 2-decenal              | 180.51±1.73 <sup>e</sup>  | 219.85±1.60 <sup>d</sup>  | 437.48±6.61 <sup>c</sup>  | 608.70±14.60 <sup>b</sup>  | 629.12±18.32 <sup>b</sup>  | 772.34±53.57 <sup>a</sup> |
| 4-propylbenzaldehyde   | 21.19±0.16 <sup>a</sup>   | 18.08±0.04 <sup>b</sup>   | 17.30±0.23 <sup>b</sup>   | 17.48±0.25 <sup>b</sup>    | 17.64±0.05 <sup>b</sup>    | 17.91±0.41 <sup>b</sup>   |
| 2,4-decadienal         | 17.49±0.44 <sup>e</sup>   | 28.16±1.49 <sup>d</sup>   | 40.45±1.07 <sup>c</sup>   | 50.03±1.06 <sup>b</sup>    | 50.16±1.64 <sup>b</sup>    | 54.42±0.69 <sup>a</sup>   |
| Geranylacetone         | 46.72±0.70 <sup>a</sup>   | 37.24±2.18 <sup>b</sup>   | 39.97±1.97 <sup>b</sup>   | 26.03±0.31 <sup>c</sup>    | 23.37±0.03 <sup>d</sup>    | 23.90±0.91 <sup>d</sup>   |
| Terpenes               |                           |                           |                           |                            |                            |                           |
| D-limonene             | 549.94±40.04 <sup>a</sup> | 363.70±27.55 <sup>b</sup> | 130.46±1.65 <sup>c</sup>  | 105.86±6.34 <sup>d</sup>   | 80.18±4.75 <sup>e</sup>    | 85.96±0.97 <sup>e</sup>   |
| Citronellal            | 49.87±1.30 <sup>a</sup>   | 51.20±0.49 <sup>a</sup>   | 47.85±0.03 <sup>b</sup>   | 41.38±0.84 <sup>c</sup>    | 41.71±1.03 <sup>c</sup>    | 47.83±1.03 <sup>b</sup>   |
| Guaiacol               | 18.26±0.10 <sup>c</sup>   | 19.97±0.03 <sup>b</sup>   | 19.33±0.45 <sup>b</sup>   | 22.06±0.04 <sup>a</sup>    | 21.88±0.08 <sup>a</sup>    | 21.66±0.40 <sup>a</sup>   |
| Linalool               | 52.66±0.65 <sup>d</sup>   | 88.73±1.32 <sup>c</sup>   | 89.22±0.25 <sup>c</sup>   | 96.11±1.35 <sup>a</sup>    | 92.99±0.18 <sup>b</sup>    | 97.46±1.25 <sup>a</sup>   |
| Trans-verbenol         | 2.43±0.04 <sup>c</sup>    | 2.97±0.03 <sup>c</sup>    | 3.39±0.34 <sup>b</sup>    | 4.22±0.08 <sup>a</sup>     | 4.42±0.06 <sup>a</sup>     | 3.66±0.02 <sup>b</sup>    |
| Menthol                | 4.63±0.11 <sup>e</sup>    | 6.89±0.61 <sup>d</sup>    | 7.75±0.15 <sup>c</sup>    | 9.01±0.25 <sup>b</sup>     | 9.79±0.20 <sup>b</sup>     | 11.51±0.07 <sup>a</sup>   |
| Nerol                  | -                         | 3.38±0.11 <sup>e</sup>    | 7.70±0.06 <sup>d</sup>    | 13.18±0.01 <sup>b</sup>    | 12.52±0.17 <sup>c</sup>    | 15.46±0.07 <sup>a</sup>   |
| Citral                 | 3.90±0.11 <sup>c</sup>    | 8.79±0.15 <sup>b</sup>    | 8.41±0.15 <sup>b</sup>    | 10.01±0.05 <sup>a</sup>    | 9.87±0.59 <sup>a</sup>     | 10.91±0.66 <sup>a</sup>   |
| Eugenol                | 7.98±0.14 <sup>e</sup>    | 10.14±0.27 <sup>d</sup>   | 12.27±0.14 <sup>c</sup>   | 15.82±0.02 <sup>b</sup>    | 15.86±0.44 <sup>b</sup>    | 17.48±0.68 <sup>a</sup>   |
| β-damascenon           | 5.90±0.00 <sup>d</sup>    | 9.13±0.05 <sup>c</sup>    | 9.09±0.01 <sup>c</sup>    | 9.81±0.01 <sup>b</sup>     | 9.76±0.34 <sup>b</sup>     | 12.82±0.20 <sup>a</sup>   |
| α-ionon                | 2.38±0.04 <sup>d</sup>    | 2.75±0.00 <sup>c</sup>    | 2.90±0.12 <sup>c</sup>    | 3.85±0.04 <sup>b</sup>     | 3.54±0.24 <sup>b</sup>     | 4.22±0.06 <sup>a</sup>    |
| γ-ionone               | 6.21±0.04 <sup>c</sup>    | 5.73±0.10 <sup>d</sup>    | 8.17±0.35 <sup>b</sup>    | 10.85±0.09 <sup>a</sup>    | 10.86±0.55 <sup>a</sup>    | 10.39±0.03 <sup>a</sup>   |
| β-ionone               | 9.10±0.13 <sup>e</sup>    | 10.08±0.06 <sup>d</sup>   | 10.25±0.01 <sup>d</sup>   | 12.12±0.10 <sup>b</sup>    | 11.75±0.11 <sup>c</sup>    | 12.81±0.19 <sup>a</sup>   |

Values in the same raw marked with different superscripts are statistically different at  $p \leq 0.05$  (ANOVA, Fisher's LSD).
